# Supplementary material for: A colorimetric chemosensor based on a Schiff base for highly selective sensing of cyanide in aqueous solution: the influence of solvents
Source: Royal Society of Chemistry journal article supplement (doi:10.1039/c4nj01199f), 2014-01-01
Supplement: c4nj01199f1.pdf [file c4nj01199f1.pdf]

## Supporting Information

### **Colorimetric chemosensor based on a Schiff base for highly selective sensing of cyanide in aqueous solution: Influence of solvents**

Yu Jeong Na, Gyeong Jin Park, Hyun Yong Jo, Seul Ah Lee, Cheal Kim\*

*Department of Fine Chemistry and Department of Interdisciplinary Bio IT Materials, Seoul National University of Science and Technology, Seoul 139-743, Korea. Fax: +82-2-973-9149; Tel: +82-2-970-6693; E-mail: [chealkim@seoultech.ac.kr](mailto:chealkim@seoultech.ac.kr)*

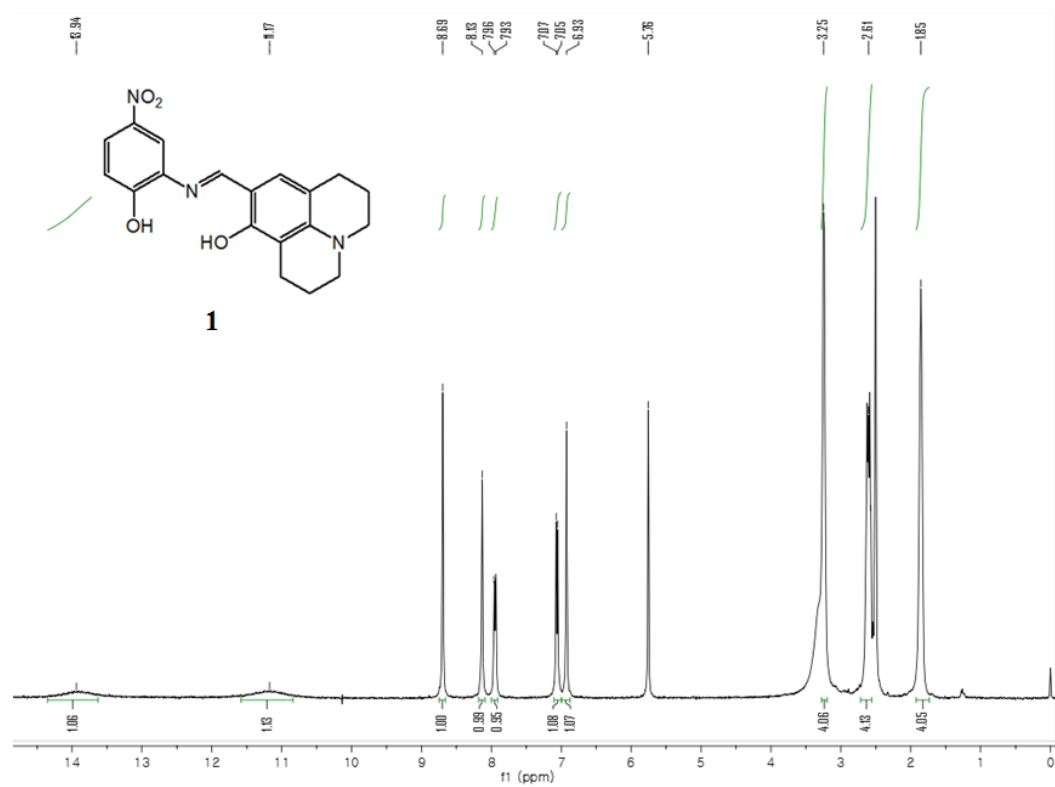

**Fig. S1** <sup>1</sup>H NMR spectrum of **1**.

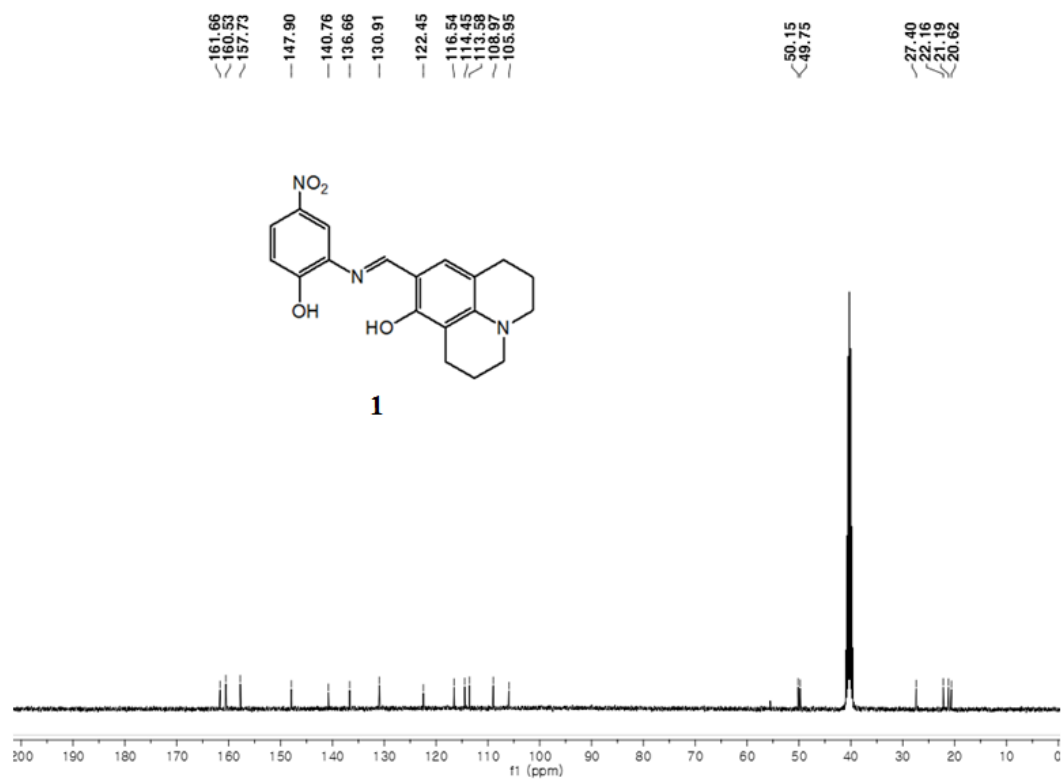

**Fig. S2**  $^{13}\text{C}$  NMR spectrum of **1**.

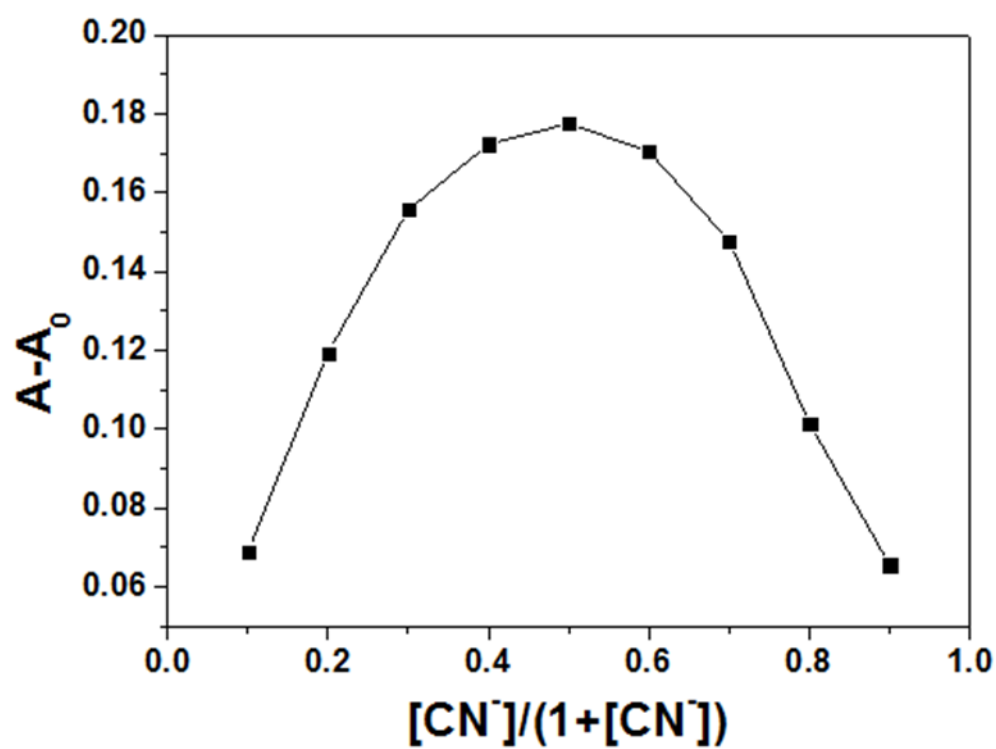

**Fig. S3** Job plot of receptor **1** and cyanide in a mixture of methanol/H<sub>2</sub>O (2:1, v/v).

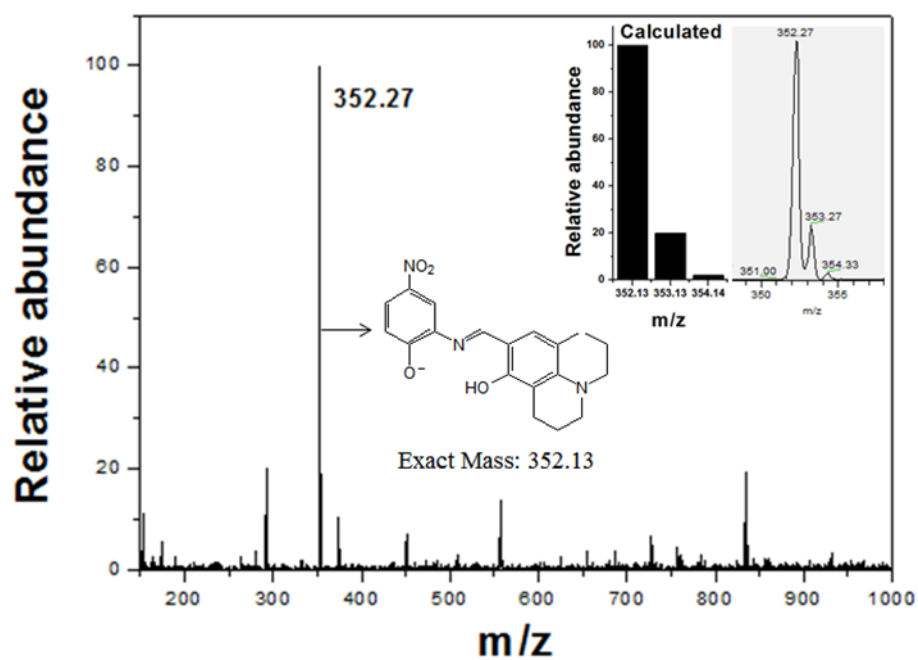

**Fig. S4** Negative-ion electrospray ionization mass spectrum of **1** upon addition of 1 equiv of  $\text{CN}^-$  in a mixture of methanol/ $\text{H}_2\text{O}$  (2:1, v/v).

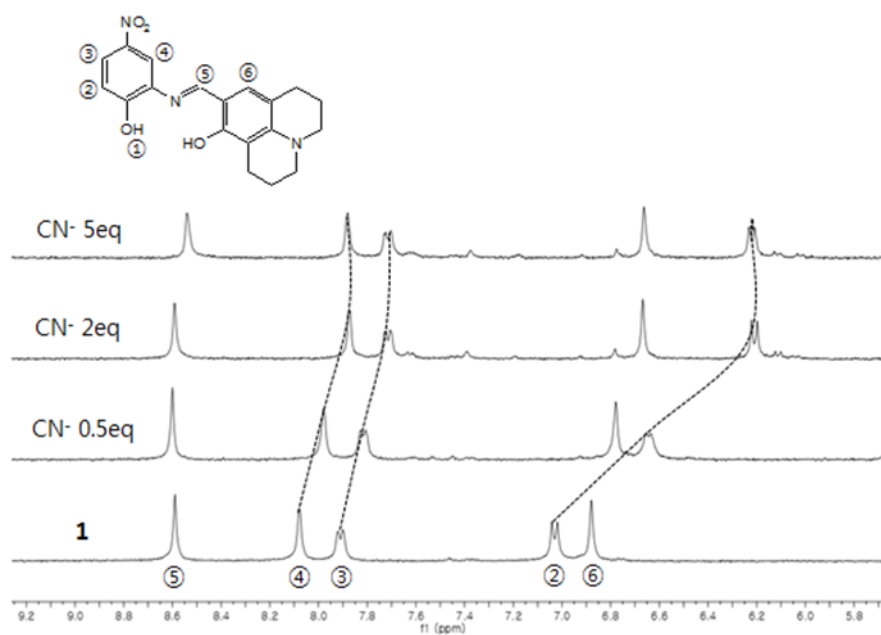

**Fig. S5** <sup>1</sup>H NMR titration of **1** (10 mM) with CN<sup>-</sup> in DMSO-*d*<sub>6</sub>/CD<sub>3</sub>OD/D<sub>2</sub>O (5:2:1, v/v/v).

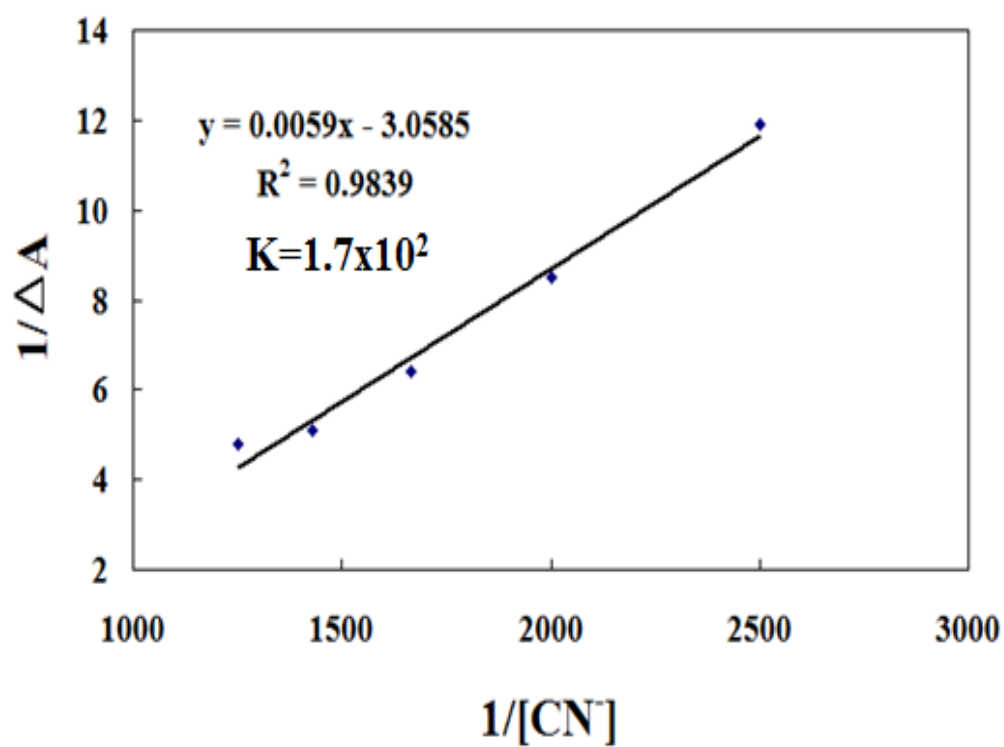

**Fig. S6** Benesi-Hildebrand plot (absorbance at 479 nm) of **1**, assuming a 1:1 stoichiometry for association between **1** and  $\text{CN}^-$  in a mixture of methanol/ $\text{H}_2\text{O}$  (2:1, v/v).

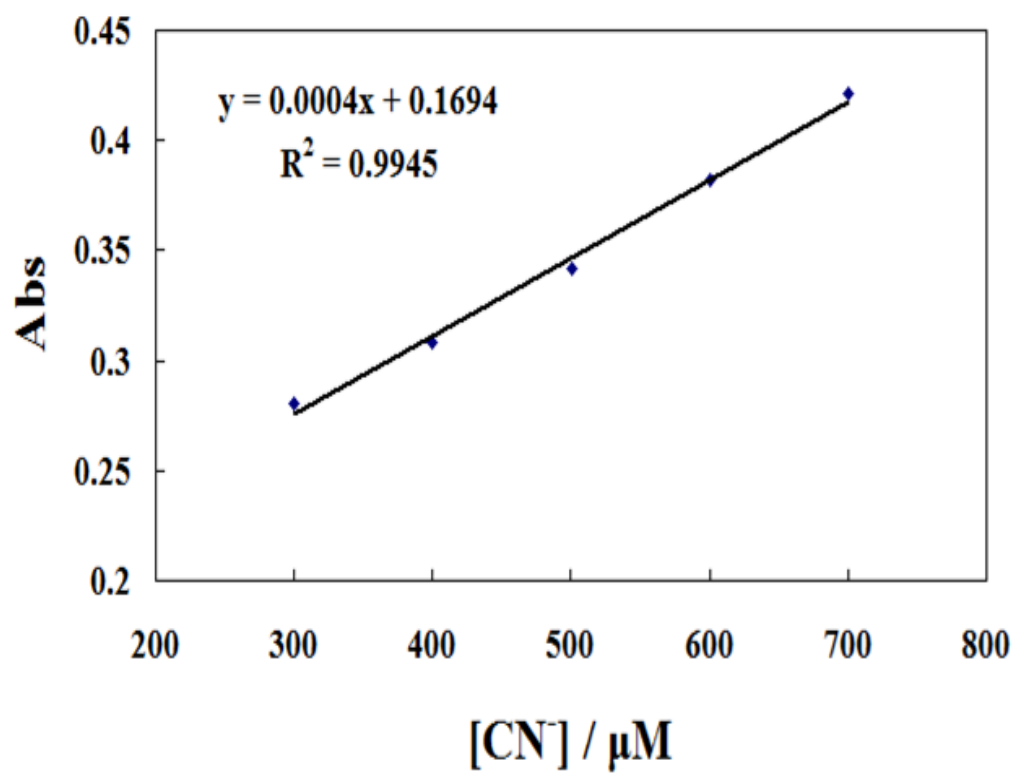

**Fig. S7** Determination of the detection limit based on absorbance change (absorbance at 500 nm) of **1** (20 μM) with CN<sup>-</sup> in a mixture of methanol/H<sub>2</sub>O (2:1, v/v).



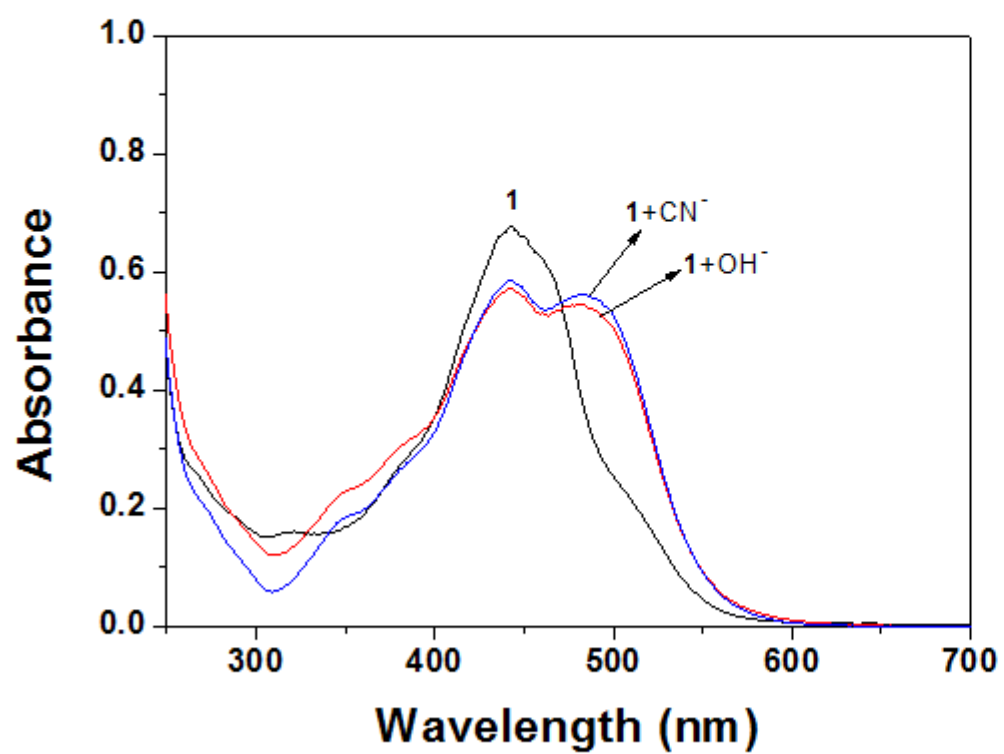

**Fig. S8** Changes in the UV-vis spectra of receptor **1** upon addition of  $\text{CN}^-$  and  $\text{OH}^-$ , respectively, in a mixture of methanol/ $\text{H}_2\text{O}$  (2:1, v/v).

(a)

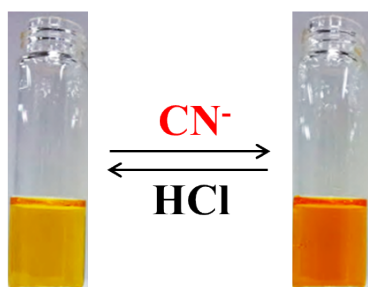

(b)

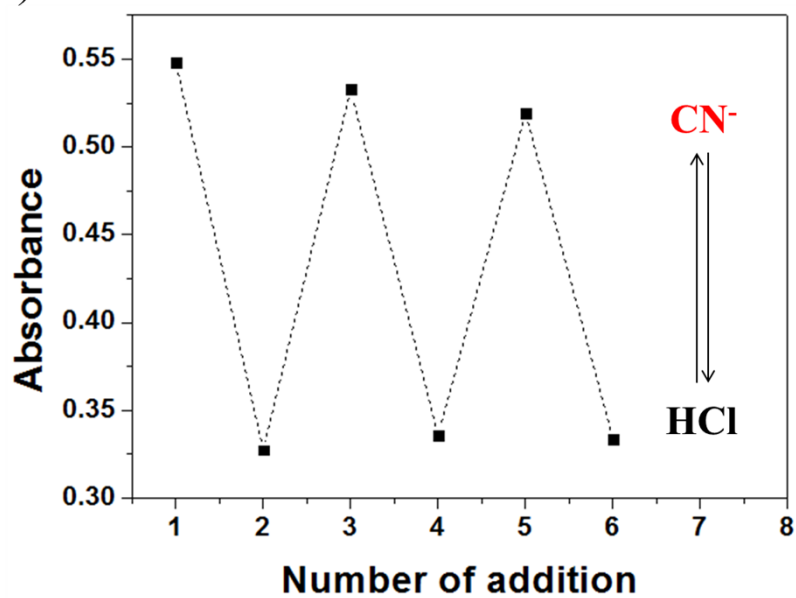

**Fig. S9** (a) Colorimetric changes of **1** (20  $\mu\text{M}$ ) after the sequential addition of  $\text{CN}^-$  and  $\text{HCl}$  in a mixture of methanol/H<sub>2</sub>O (2:1, v/v). (b) Reversible changes in absorbance of **1** (20  $\mu\text{M}$ ) at 500 nm after the sequential addition of  $\text{CN}^-$  and  $\text{HCl}$ .

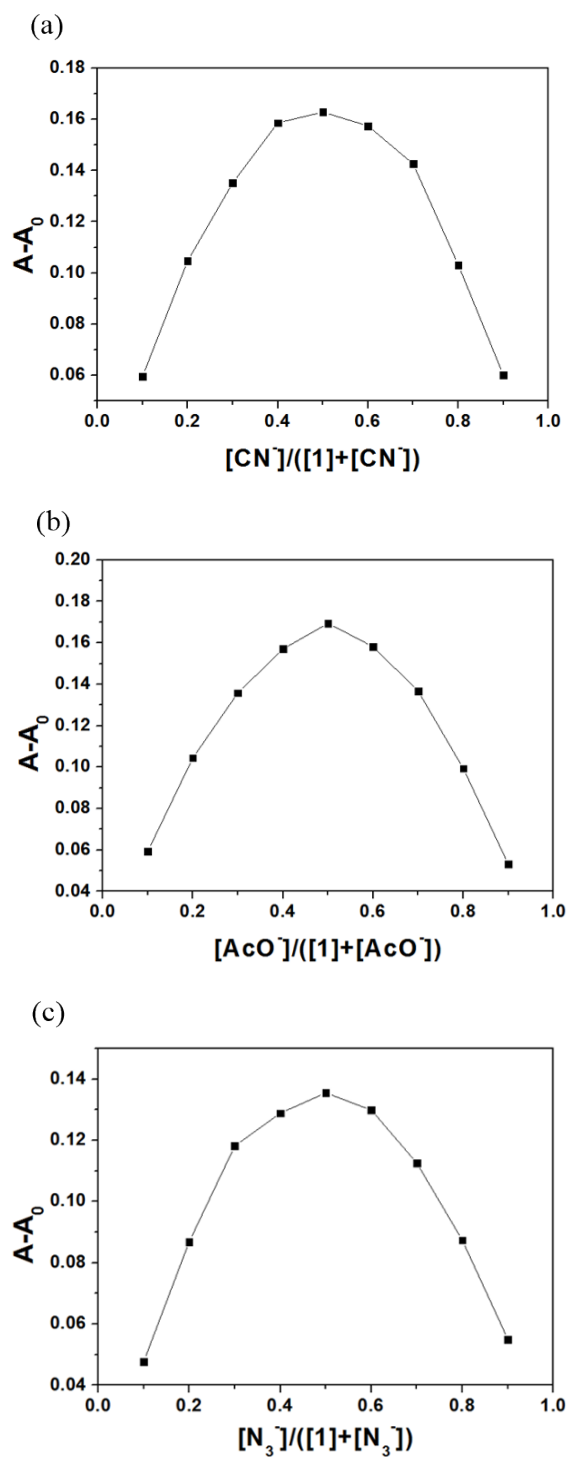

**Fig. S10** Job plots of receptor **1** with (a)  $\text{CN}^-$ , (b)  $\text{AcO}^-$ , and (c)  $\text{N}_3^-$  in methanol.

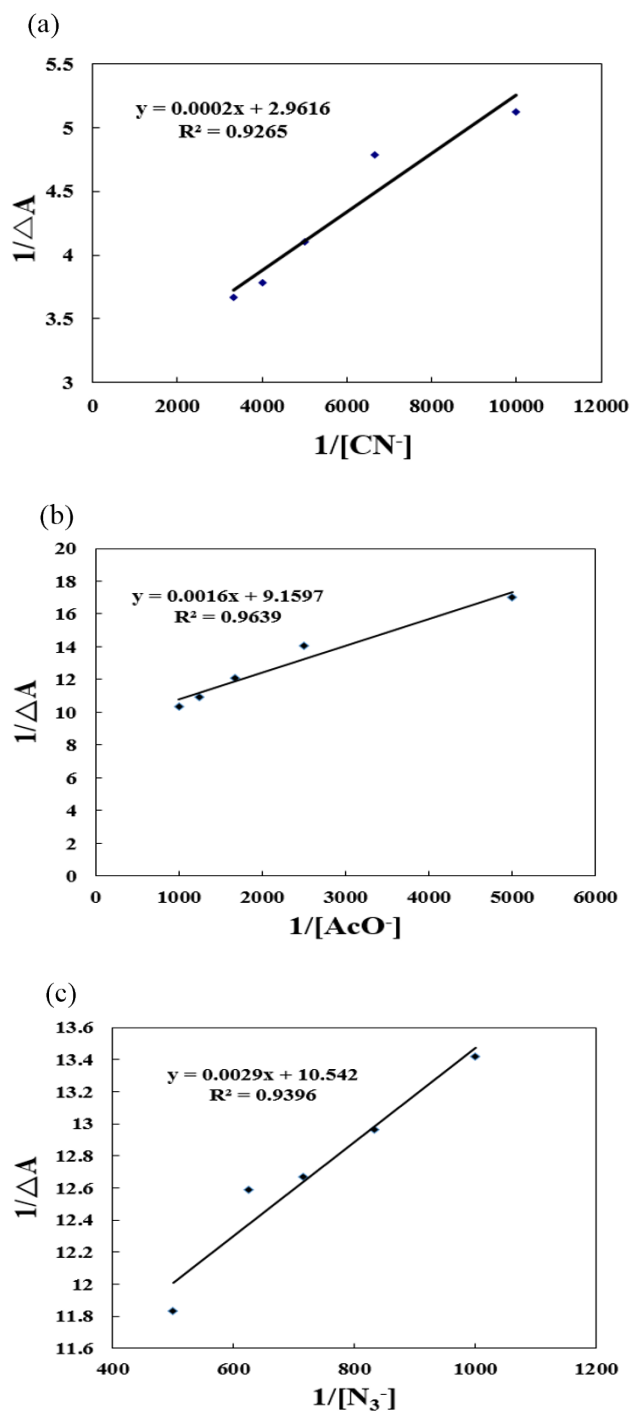

**Fig. S11** Benesi-Hildebrand plots (absorbance at 500 nm) of **1**, assuming a 1:1 stoichiometry for association between **1** and (a)  $CN^-$ , (b)  $AcO^-$ , (c)  $N_3^-$  in methanol.

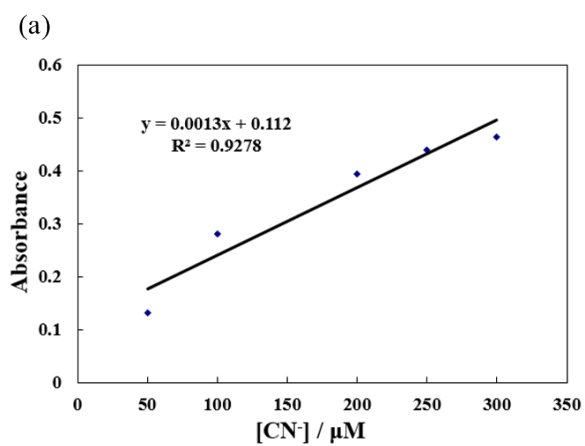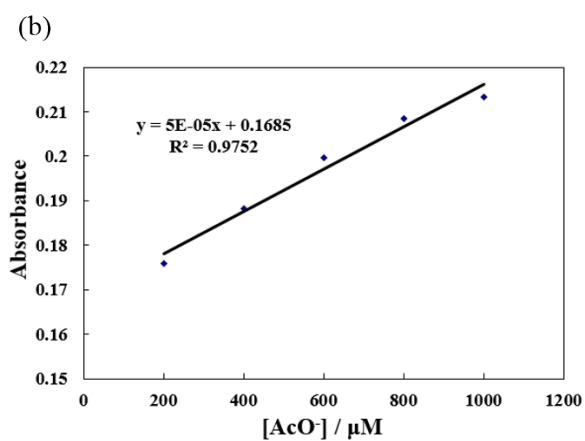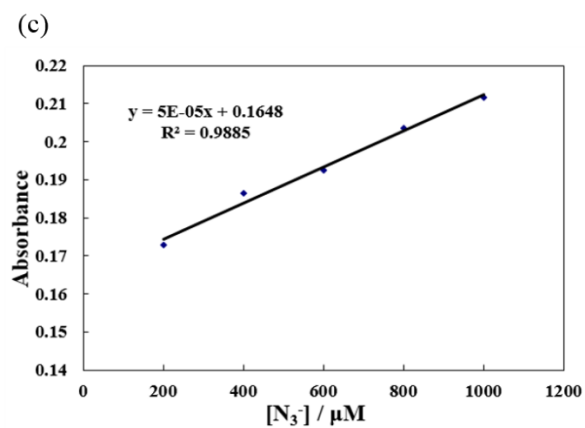

**Fig. S12** Determination of the detection limit based on absorbance change (absorbance at 500 nm) of **1** (20  $\mu\text{M}$ ) with (a)  $\text{CN}^-$ , (b)  $\text{AcO}^-$ , and (c)  $\text{N}_3^-$  in methanol.

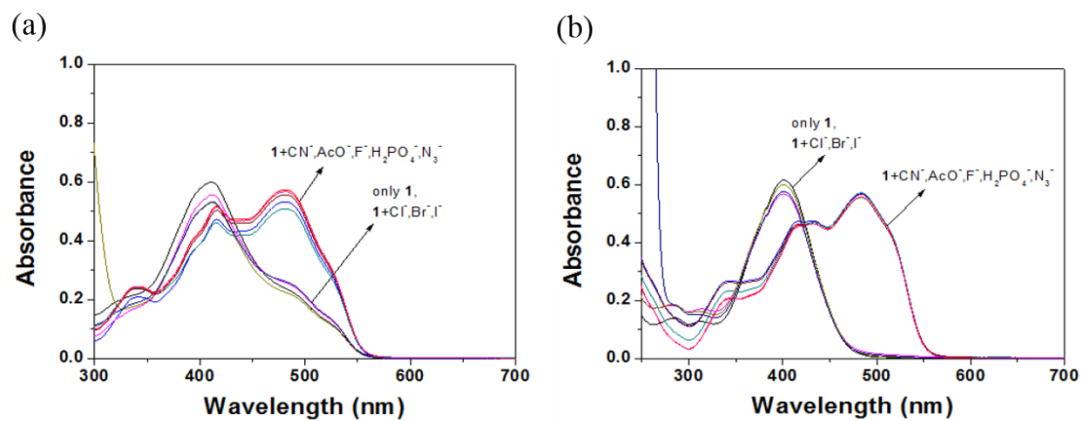

**Fig. S13** (a) UV-vis spectral changes of **1** (20  $\mu$ M) upon the addition of various anions (40 equiv) in DMF. (b) UV-vis spectral changes of **1** (20  $\mu$ M) upon the addition of various anions (40 equiv) in acetonitrile.

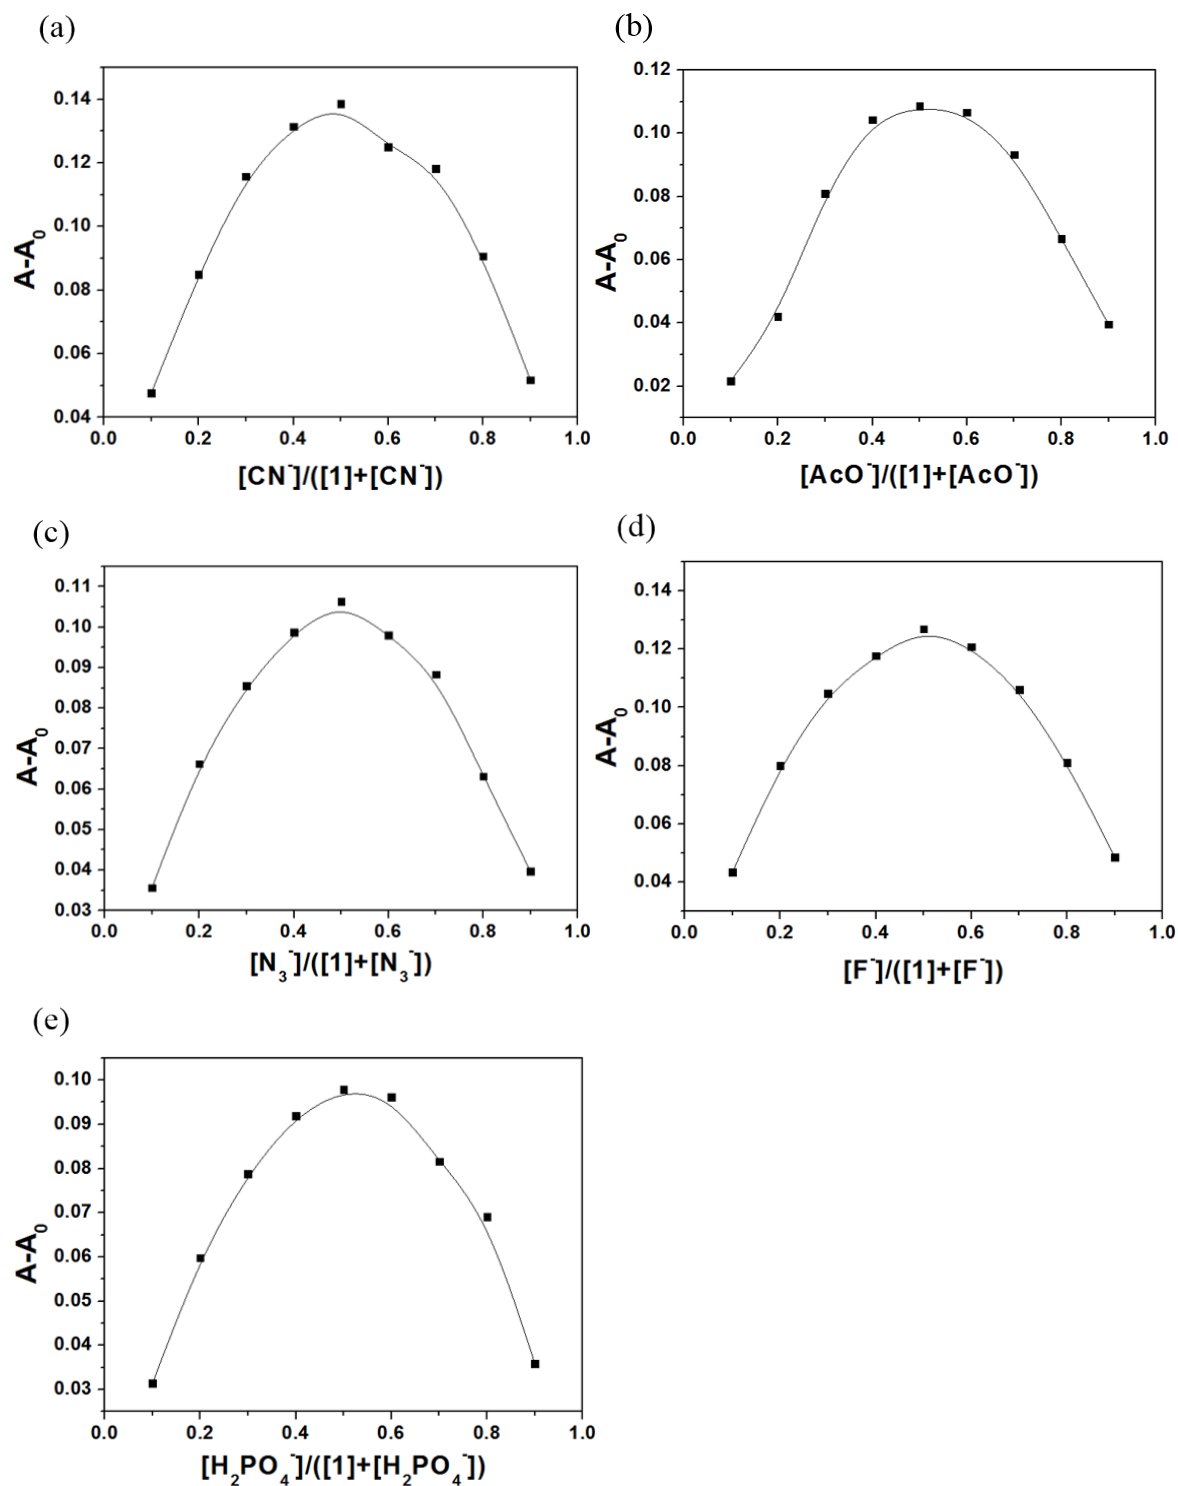

**Fig. S14** Job plots of receptor **1** with (a)  $\text{CN}^-$ , (b)  $\text{AcO}^-$ , (c)  $\text{N}_3^-$ , (d)  $\text{F}^-$ , and (e)  $\text{H}_2\text{PO}_4^-$  in DMSO.

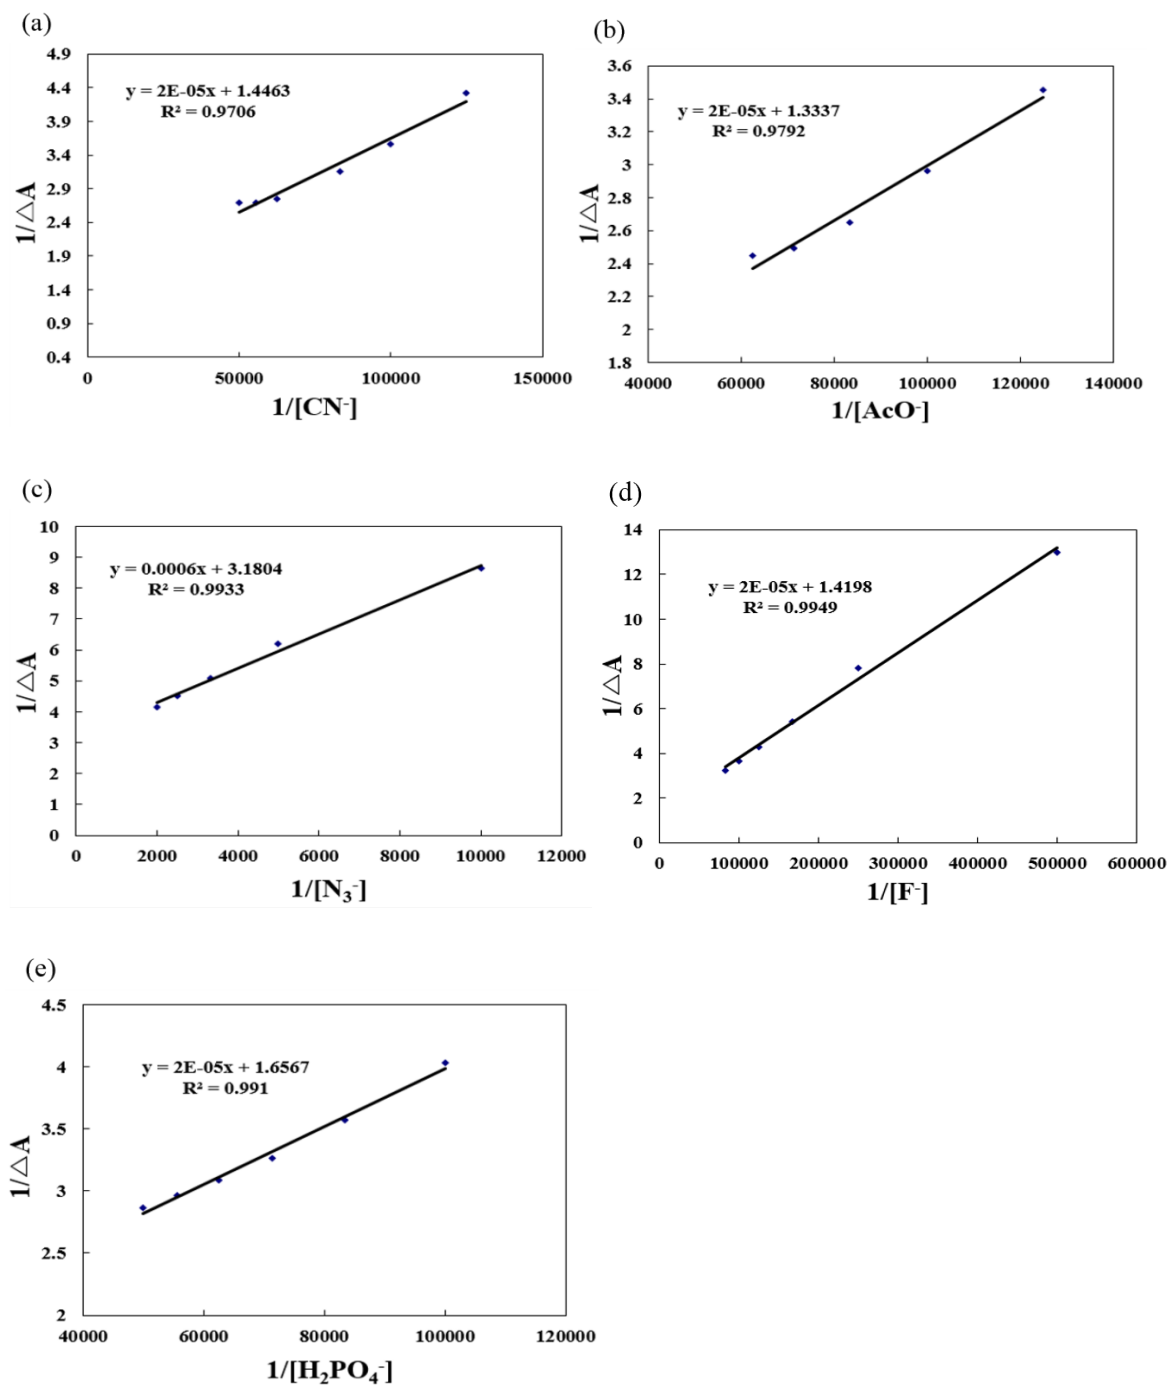

**Fig. S15** Benesi-Hildebrand plots (absorbance at 500 nm) of **1**, assuming a 1:1 stoichiometry for association between **1** and (a)  $\text{CN}^-$ , (b)  $\text{AcO}^-$ , (c)  $\text{N}_3^-$ , (d)  $\text{F}^-$ , (e)  $\text{H}_2\text{PO}_4^-$  in DMSO.



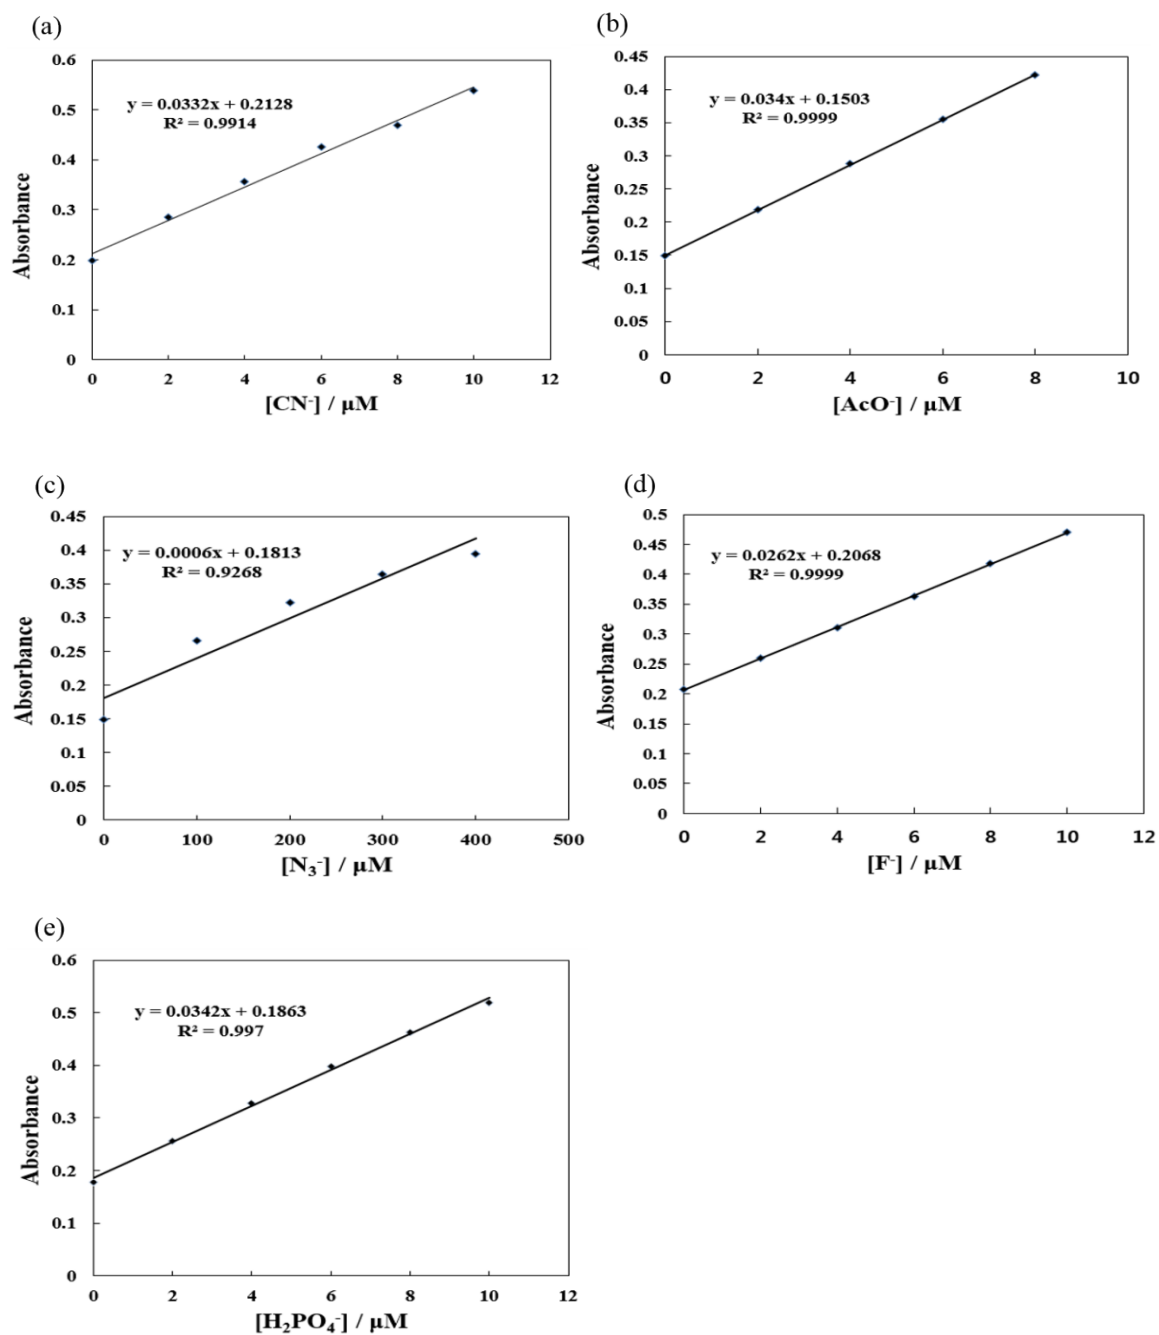

**Fig. S16** Determination of the detection limit based on intensity change (absorbance at 500 nm) of **1** (20  $\mu\text{M}$ ) (a) with  $\text{CN}^-$ , (b)  $\text{AcO}^-$ , (c)  $\text{N}_3^-$ , (d)  $\text{F}^-$ , and (e)  $\text{H}_2\text{PO}_4^-$  in DMSO.
